# Supplementary material for: From radical to triradical thin film processes: the Blatter radical derivatives
Source: Royal Society of Chemistry journal article supplement (doi:10.1039/d1tc01541a), 2021-01-01
Supplement: d1tc01541a1.pdf [file d1tc01541a1.pdf]

# From radical to triradical thin film processes: the Blatter radical derivatives.

*A. Calzolari,<sup>‡</sup> A. Rajca,<sup>§</sup> M. B. Casu<sup>†\*</sup>*

<sup>‡</sup> CNR-NANO Istituto Nanoscienze, Centro S3, I-41125 Modena, Italy

<sup>§</sup>Department of Chemistry, University of Nebraska, Lincoln, United States

<sup>†</sup>Institute of Physical and Theoretical Chemistry, University of Tübingen, Auf der Morgenstelle  
18, 72076 Tübingen, Germany

\*[benedetta.casu@uni-tuebingen.de](mailto:benedetta.casu@uni-tuebingen.de)

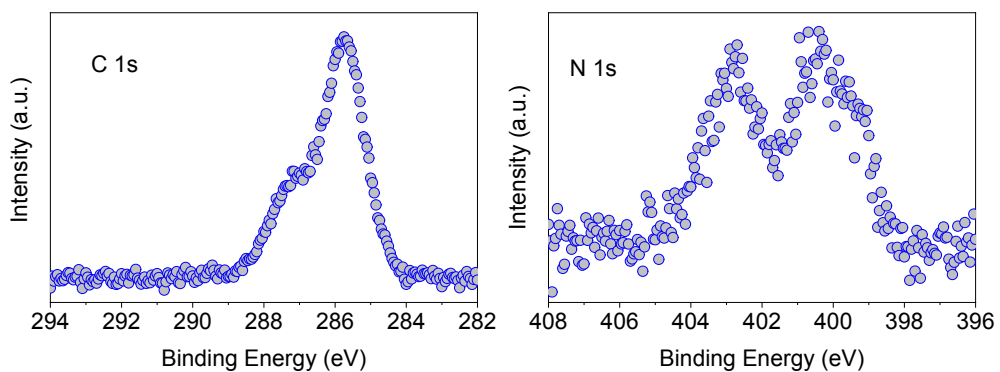

Figure S1. diNN-Blatter thin films C 1s and N 1s core-level spectra, as indicated, of a thin film not stoichiometrically correct, i.e., the evaporation was not successful as clearly seen from the intensity of the two features in the N 1s spectrum that show the same intensity. For the correct intensity see Figure 2.

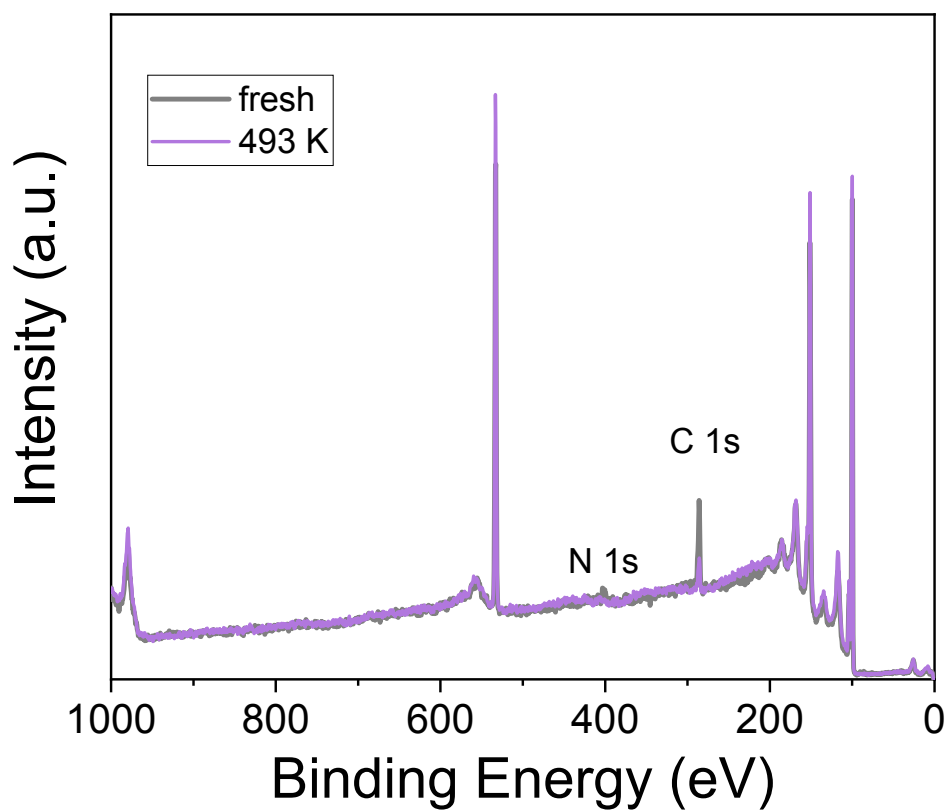

Figure S2. diNN-Blatter XPS survey spectra: the comparison between the freshly evaporated and after annealing spectra, as indicated, is shown. After annealing at 493 K the N 1s signal disappears indicating that the molecule is desorbed.
